# Supplementary material for: CD19 CAR T Cells Expressing IL-12 Eradicate Lymphoma in Fully Lymphoreplete Mice through Induction of Host Immunity
Source: PubMed Central journal article supplement (PMC5772011; doi:10.1016/j.omto.2017.12.003), 2017-12-19

**OMTO, Volume 8**

**Supplemental Information**

**CD19 CAR T Cells Expressing IL-12 Eradicate  
Lymphoma in Fully Lymphoreplete Mice  
through Induction of Host Immunity**

**Gray Kueberuwa, Milena Kalaitidou, Eleanor Cheadle, Robert Edward  
Hawkins, and David Edward Gilham**

Supplementary Figure 1

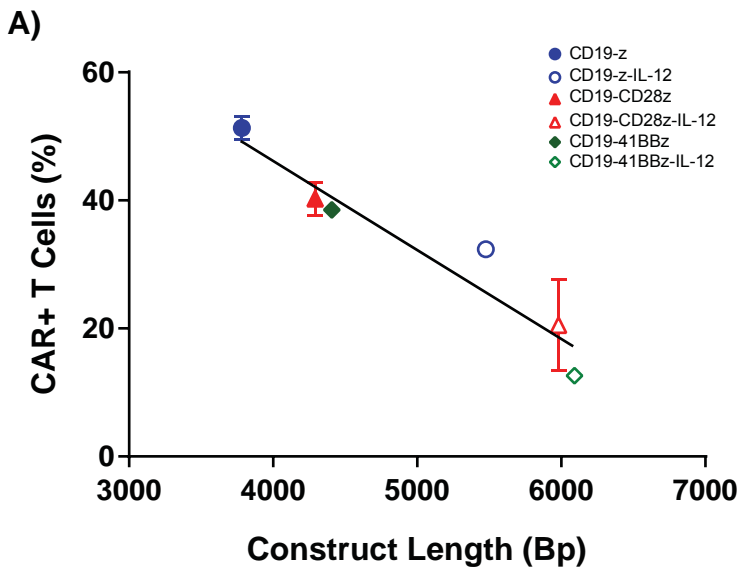

Supplementary Figure 2

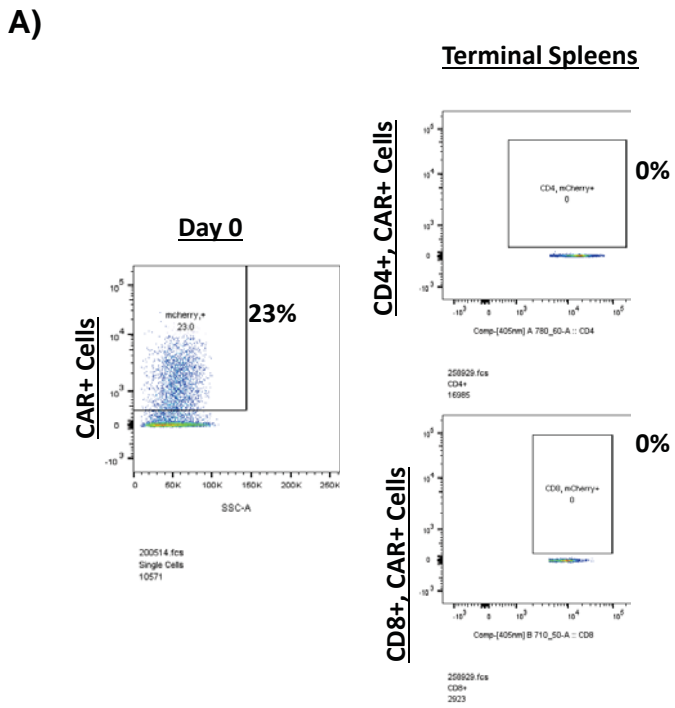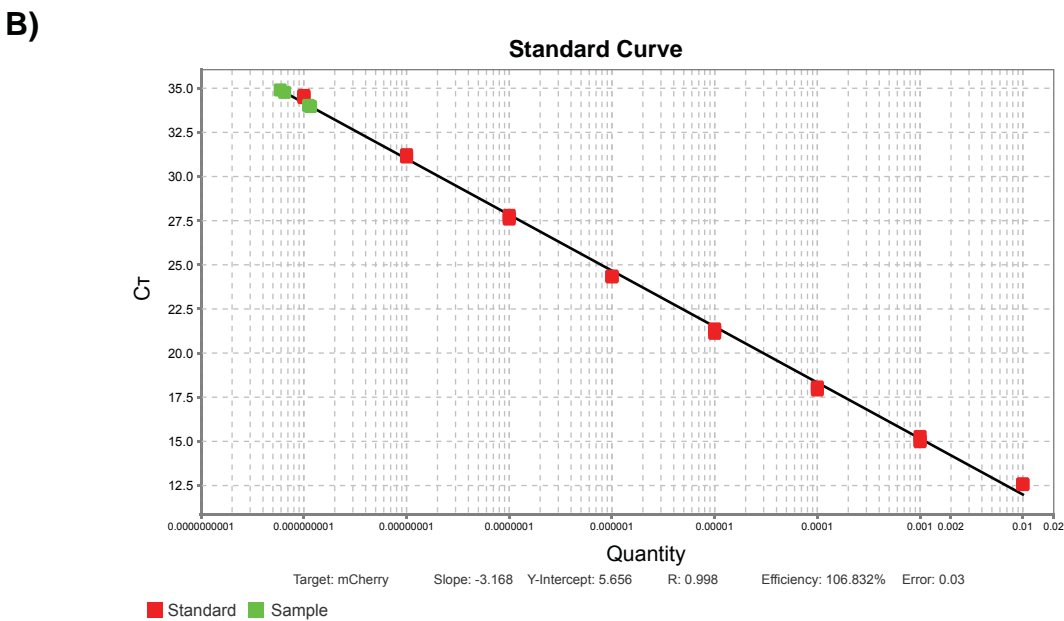

Supplement: mmc1.pdf [file mmc1.pdf]
